# Supplementary material for: Discrimination between earthquakes and quarry blasts in the Aswan region, southern Egypt using P-wave source spectra
Source: Research Square preprint supplement (doi:10.21203/rs.3.rs-1437937/v1), 2022-03-21
Supplement: Supplementary file 1 [file 4178f30a9ce857adafaa3204.docx]

Table S2. The obtained spectral parameters for each events (earthquakes and quarry blasts).

| ID |  |  |  |  | Mw | Event type |
| --- | --- | --- | --- | --- | --- | --- |
| 1 | 3.4E-06 | 17.7 | 4.8E+17 | 17.7 | 1.6 | Earthquake |
| 2 | 1.0E-06 | 21.4 | 1.4E+17 | 17.1 | 1.2 | Earthquake |
| 3 | 1.2E-06 | 17.3 | 1.6E+17 | 17.2 | 1.2 | Earthquake |
| 4 | 1.5E-06 | 17.4 | 2.2E+17 | 17.3 | 1.3 | Earthquake |
| 5 | 6.4E-06 | 17.4 | 9.1E+17 | 18.0 | 1.7 | Earthquake |
| 6 | 9.3E-06 | 19.6 | 1.3E+18 | 18.1 | 1.8 | Earthquake |
| 7 | 1.7E-06 | 19.6 | 2.4E+17 | 17.4 | 1.4 | Earthquake |
| 8 | 1.2E-06 | 19.8 | 1.6E+17 | 17.2 | 1.2 | Earthquake |
| 9 | 6.7E-05 | 13.6 | 9.5E+18 | 19.0 | 2.4 | Earthquake |
| 10 | 1.4E-05 | 18.0 | 2.0E+18 | 18.3 | 2.0 | Earthquake |
| 11 | 7.7E-05 | 17.2 | 1.1E+19 | 19.0 | 2.5 | Earthquake |
| 12 | 1.1E-05 | 20.2 | 1.6E+18 | 18.2 | 1.9 | Earthquake |
| 13 | 8.6E-06 | 18.5 | 1.2E+18 | 18.1 | 1.8 | Earthquake |
| 14 | 3.0E-05 | 13.4 | 4.3E+18 | 18.6 | 2.2 | Earthquake |
| 15 | 6.5E-05 | 14.0 | 9.2E+18 | 19.0 | 2.4 | Earthquake |
| 16 | 4.7E-05 | 9.7 | 6.6E+18 | 18.8 | 2.3 | Earthquake |
| 17 | 3.9E-06 | 12.8 | 5.5E+17 | 17.7 | 1.6 | Earthquake |
| 18 | 1.9E-06 | 20.8 | 2.7E+17 | 17.4 | 1.4 | Earthquake |
| 19 | 6.1E-06 | 20.2 | 8.6E+17 | 17.9 | 1.7 | Earthquake |
| 20 | 4.7E-06 | 21.6 | 6.6E+17 | 17.8 | 1.7 | Earthquake |
| 21 | 5.6E-06 | 18.6 | 7.9E+17 | 17.9 | 1.7 | Earthquake |
| 22 | 1.9E-06 | 18.1 | 2.7E+17 | 17.4 | 1.4 | Earthquake |
| 23 | 1.4E-05 | 17.0 | 1.9E+18 | 18.3 | 2.0 | Earthquake |
| 24 | 2.6E-05 | 17.3 | 3.6E+18 | 18.6 | 2.1 | Earthquake |
| 25 | 2.0E-05 | 19.0 | 2.8E+18 | 18.4 | 2.1 | Earthquake |
| 26 | 1.9E-05 | 18.6 | 2.6E+18 | 18.4 | 2.1 | Earthquake |
| 27 | 8.1E-06 | 14.5 | 1.1E+18 | 18.1 | 1.8 | Earthquake |
| 28 | 2.3E-05 | 18.3 | 3.2E+18 | 18.5 | 2.1 | Earthquake |
| 29 | 3.3E-05 | 17.0 | 4.7E+18 | 18.7 | 2.2 | Earthquake |
| 30 | 1.5E-05 | 17.9 | 2.1E+18 | 18.3 | 2.0 | Earthquake |
| 31 | 1.6E-05 | 13.6 | 2.3E+18 | 18.4 | 2.0 | Earthquake |
| 32 | 2.9E-06 | 22.0 | 4.1E+17 | 17.6 | 1.5 | Earthquake |
| 33 | 8.6E-06 | 17.5 | 1.2E+18 | 18.1 | 1.8 | Earthquake |
| 34 | 4.1E-04 | 9.7 | 5.8E+19 | 19.8 | 2.9 | Earthquake |
| 35 | 2.9E-06 | 21.4 | 4.1E+17 | 17.6 | 1.5 | Earthquake |
| 36 | 6.8E-06 | 18.7 | 9.6E+17 | 18.0 | 1.8 | Earthquake |
| 37 | 2.9E-06 | 20.9 | 4.1E+17 | 17.6 | 1.5 | Earthquake |
| 38 | 8.4E-06 | 20.6 | 1.2E+18 | 18.1 | 1.8 | Earthquake |
| 39 | 1.3E-05 | 20.2 | 1.9E+18 | 18.3 | 1.9 | Earthquake |
| 40 | 6.3E-06 | 23.3 | 8.8E+17 | 17.9 | 1.7 | Earthquake |
| 41 | 3.1E-06 | 15.7 | 4.3E+17 | 17.6 | 1.5 | Earthquake |
| 42 | 3.0E-05 | 1.7 | 4.3E+18 | 18.6 | 2.2 | Quarry |
| 43 | 1.6E-06 | 14.4 | 2.3E+17 | 17.4 | 1.3 | Earthquake |
| 44 | 1.3E-05 | 20.0 | 1.8E+18 | 18.2 | 1.9 | Earthquake |
| 45 | 4.6E-06 | 15.9 | 6.4E+17 | 17.8 | 1.6 | Earthquake |
| 46 | 5.0E-05 | 10.7 | 7.1E+18 | 18.9 | 2.3 | Earthquake |
| 47 | 7.5E-06 | 18.2 | 1.1E+18 | 18.0 | 1.8 | Earthquake |
| 48 | 4.7E-06 | 22.8 | 6.6E+17 | 17.8 | 1.6 | Earthquake |
| 49 | 3.1E-06 | 17.8 | 4.4E+17 | 17.6 | 1.5 | Earthquake |
| 50 | 8.5E-06 | 15.9 | 1.2E+18 | 18.1 | 1.8 | Earthquake |
| 51 | 3.7E-06 | 24.9 | 5.2E+17 | 17.7 | 1.6 | Earthquake |
| 52 | 4.3E-06 | 18.8 | 6.0E+17 | 17.8 | 1.6 | Earthquake |
| 53 | 1.3E-06 | 19.2 | 1.8E+17 | 17.3 | 1.3 | Earthquake |
| 54 | 1.3E-06 | 17.5 | 1.9E+17 | 17.3 | 1.3 | Earthquake |
| 55 | 7.2E-07 | 16.8 | 1.0E+17 | 17.0 | 1.1 | Earthquake |
| 56 | 2.2E-06 | 20.6 | 3.1E+17 | 17.5 | 1.4 | Earthquake |
| 57 | 2.1E-06 | 19.9 | 2.9E+17 | 17.5 | 1.4 | Earthquake |
| 58 | 2.6E-06 | 13.2 | 3.6E+17 | 17.6 | 1.5 | Earthquake |
| 59 | 4.7E-05 | 17.6 | 6.6E+18 | 18.8 | 2.3 | Earthquake |
| 60 | 4.0E-06 | 19.5 | 5.7E+17 | 17.8 | 1.6 | Earthquake |
| 61 | 1.9E-06 | 22.4 | 2.6E+17 | 17.4 | 1.4 | Earthquake |
| 62 | 2.8E-06 | 16.7 | 3.9E+17 | 17.6 | 1.5 | Earthquake |
| 63 | 6.1E-06 | 17.0 | 8.6E+17 | 17.9 | 1.7 | Earthquake |
| 64 | 3.5E-05 | 2.2 | 4.9E+18 | 18.7 | 2.2 | Quarry |
| 65 | 5.7E-06 | 20.8 | 8.1E+17 | 17.9 | 1.7 | Earthquake |
| 66 | 4.3E-05 | 12.1 | 6.1E+18 | 18.8 | 2.3 | Earthquake |
| 67 | 9.8E-06 | 16.3 | 1.4E+18 | 18.1 | 1.9 | Earthquake |
| 68 | 7.6E-05 | 14.4 | 1.1E+19 | 19.0 | 2.5 | Earthquake |
| 69 | 9.2E-05 | 14.4 | 1.3E+19 | 19.1 | 2.5 | Earthquake |
| 70 | 6.3E-06 | 21.6 | 8.9E+17 | 17.9 | 1.7 | Earthquake |
| 71 | 1.1E-05 | 14.9 | 1.6E+18 | 18.2 | 1.9 | Earthquake |
| 72 | 1.7E-05 | 16.2 | 2.4E+18 | 18.4 | 2.0 | Earthquake |
| 73 | 1.3E-04 | 12.4 | 1.8E+19 | 19.3 | 2.6 | Earthquake |
| 74 | 5.2E-05 | 16.4 | 7.3E+18 | 18.9 | 2.3 | Earthquake |
| 75 | 1.5E-05 | 20.6 | 2.1E+18 | 18.3 | 2.0 | Earthquake |
| 76 | 1.1E-05 | 19.3 | 1.6E+18 | 18.2 | 1.9 | Earthquake |
| 77 | 3.3E-06 | 19.5 | 4.6E+17 | 17.7 | 1.5 | Earthquake |
| 78 | 5.4E-05 | 1.6 | 7.6E+18 | 18.9 | 2.4 | Quarry |
| 79 | 2.3E-05 | 11.1 | 3.2E+18 | 18.5 | 2.1 | Earthquake |
| 80 | 4.6E-06 | 22.8 | 6.5E+17 | 17.8 | 1.6 | Earthquake |
| 81 | 3.8E-06 | 16.3 | 5.4E+17 | 17.7 | 1.6 | Earthquake |
| 82 | 3.4E-05 | 15.8 | 4.9E+18 | 18.7 | 2.2 | Earthquake |
| 83 | 2.3E-05 | 14.6 | 3.3E+18 | 18.5 | 2.1 | Earthquake |
| 84 | 4.3E-06 | 17.5 | 6.1E+17 | 17.8 | 1.6 | Earthquake |
| 85 | 1.8E-05 | 17.9 | 2.6E+18 | 18.4 | 2.0 | Earthquake |
| 86 | 1.4E-05 | 16.9 | 1.9E+18 | 18.3 | 2.0 | Earthquake |
| 87 | 1.3E-05 | 17.6 | 1.9E+18 | 18.3 | 2.0 | Earthquake |
| 88 | 1.6E-04 | 9.8 | 2.3E+19 | 19.4 | 2.7 | Earthquake |
| 89 | 3.9E-06 | 23.4 | 5.5E+17 | 17.7 | 1.6 | Earthquake |
| 90 | 3.7E-06 | 17.4 | 5.2E+17 | 17.7 | 1.6 | Earthquake |
| 91 | 8.2E-06 | 21.2 | 1.2E+18 | 18.1 | 1.8 | Earthquake |
| 92 | 1.6E-05 | 19.1 | 2.2E+18 | 18.3 | 2.0 | Earthquake |
| 93 | 1.4E-05 | 17.7 | 1.9E+18 | 18.3 | 2.0 | Earthquake |
| 94 | 3.3E-06 | 27.5 | 4.7E+17 | 17.7 | 1.6 | Earthquake |
| 95 | 1.7E-05 | 21.0 | 2.3E+18 | 18.4 | 2.0 | Earthquake |
| 96 | 7.3E-06 | 18.0 | 1.0E+18 | 18.0 | 1.8 | Earthquake |
| 97 | 4.4E-05 | 1.3 | 6.2E+18 | 18.8 | 2.3 | Quarry |
| 98 | 4.2E-05 | 1.4 | 6.0E+18 | 18.8 | 2.3 | Quarry |
| 99 | 3.1E-06 | 19.7 | 4.3E+17 | 17.6 | 1.5 | Earthquake |
| 100 | 2.6E-05 | 1.7 | 3.7E+18 | 18.6 | 2.2 | Quarry |
| 101 | 9.8E-06 | 15.3 | 1.4E+18 | 18.1 | 1.9 | Earthquake |
| 102 | 7.7E-06 | 20.6 | 1.1E+18 | 18.0 | 1.8 | Earthquake |
| 103 | 1.6E-05 | 12.7 | 2.3E+18 | 18.4 | 2.0 | Earthquake |
| 104 | 4.2E-06 | 20.3 | 5.9E+17 | 17.8 | 1.6 | Earthquake |
| 105 | 1.1E-05 | 20.7 | 1.5E+18 | 18.2 | 1.9 | Earthquake |
| 106 | 5.5E-05 | 16.5 | 7.7E+18 | 18.9 | 2.4 | Earthquake |
| 107 | 9.5E-06 | 12.2 | 1.3E+18 | 18.1 | 1.9 | Earthquake |
| 108 | 6.0E-06 | 20.4 | 8.5E+17 | 17.9 | 1.7 | Earthquake |
| 109 | 1.8E-06 | 18.0 | 2.6E+17 | 17.4 | 1.4 | Earthquake |
| 110 | 8.6E-06 | 18.0 | 1.2E+18 | 18.1 | 1.8 | Earthquake |
| 111 | 4.8E-05 | 1.5 | 6.7E+18 | 18.8 | 2.3 | Quarry |
| 112 | 2.5E-05 | 2.1 | 3.6E+18 | 18.6 | 2.1 | Quarry |
| 113 | 7.5E-06 | 21.4 | 1.1E+18 | 18.0 | 1.8 | Earthquake |
| 114 | 5.6E-06 | 18.5 | 7.9E+17 | 17.9 | 1.7 | Earthquake |
| 115 | 6.8E-05 | 10.7 | 9.6E+18 | 19.0 | 2.4 | Earthquake |
| 116 | 2.1E-05 | 19.8 | 2.9E+18 | 18.5 | 2.1 | Earthquake |
| 117 | 1.4E-05 | 2.2 | 2.0E+18 | 18.3 | 2.0 | Quarry |
| 118 | 1.1E-05 | 16.4 | 1.5E+18 | 18.2 | 1.9 | Earthquake |
| 119 | 5.2E-06 | 20.2 | 7.4E+17 | 17.9 | 1.7 | Earthquake |
| 120 | 1.9E-06 | 13.6 | 2.7E+17 | 17.4 | 1.4 | Earthquake |
| 121 | 2.7E-06 | 23.2 | 3.8E+17 | 17.6 | 1.5 | Earthquake |
| 122 | 2.5E-06 | 17.9 | 3.6E+17 | 17.6 | 1.5 | Earthquake |
| 123 | 4.0E-06 | 15.2 | 5.6E+17 | 17.7 | 1.6 | Earthquake |
| 124 | 4.8E-05 | 1.7 | 6.7E+18 | 18.8 | 2.3 | Quarry |
| 125 | 5.5E-05 | 1.4 | 7.7E+18 | 18.9 | 2.4 | Quarry |
| 126 | 1.7E-05 | 1.8 | 2.4E+18 | 18.4 | 2.0 | Quarry |
| 127 | 3.7E-05 | 1.7 | 5.2E+18 | 18.7 | 2.2 | Quarry |
| 128 | 2.3E-05 | 1.9 | 3.3E+18 | 18.5 | 2.1 | Quarry |
| 129 | 3.0E-05 | 1.3 | 4.3E+18 | 18.6 | 2.2 | Quarry |
| 130 | 4.0E-05 | 1.9 | 5.6E+18 | 18.8 | 2.3 | Quarry |
| 131 | 4.4E-05 | 2.6 | 6.2E+18 | 18.8 | 2.3 | Quarry |
| 132 | 5.1E-05 | 18.4 | 7.1E+18 | 18.9 | 2.3 | Earthquake |
| 133 | 2.1E-05 | 1.7 | 2.9E+18 | 18.5 | 2.1 | Quarry |
| 134 | 6.2E-06 | 18.6 | 8.8E+17 | 17.9 | 1.7 | Earthquake |
| 135 | 3.1E-06 | 22.1 | 4.4E+17 | 17.6 | 1.5 | Earthquake |
| 136 | 1.2E-05 | 16.9 | 1.7E+18 | 18.2 | 1.9 | Earthquake |
| 137 | 6.9E-05 | 1.6 | 9.8E+18 | 19.0 | 2.4 | Quarry |
| 138 | 2.3E-05 | 1.9 | 3.3E+18 | 18.5 | 2.1 | Quarry |
| 139 | 5.0E-05 | 1.9 | 7.0E+18 | 18.8 | 2.3 | Quarry |
| 140 | 2.7E-06 | 16.5 | 3.8E+17 | 17.6 | 1.5 | Earthquake |
| 141 | 7.3E-05 | 1.7 | 1.0E+19 | 19.0 | 2.4 | Quarry |
| 142 | 7.6E-05 | 1.4 | 1.1E+19 | 19.0 | 2.5 | Quarry |
| 143 | 3.4E-06 | 17.3 | 4.8E+17 | 17.7 | 1.6 | Earthquake |
| 144 | 6.0E-05 | 13.4 | 8.4E+18 | 18.9 | 2.4 | Earthquake |
| 145 | 3.7E-05 | 1.7 | 5.2E+18 | 18.7 | 2.2 | Quarry |
| 146 | 6.4E-05 | 10.6 | 9.0E+18 | 19.0 | 2.4 | Earthquake |
| 147 | 1.0E-05 | 22.0 | 1.5E+18 | 18.2 | 1.9 | Earthquake |
| 148 | 5.0E-05 | 20.4 | 7.1E+18 | 18.9 | 2.3 | Earthquake |
| 149 | 3.8E-05 | 17.8 | 5.3E+18 | 18.7 | 2.3 | Earthquake |
| 150 | 2.1E-05 | 11.2 | 3.0E+18 | 18.5 | 2.1 | Earthquake |
| 151 | 1.9E-05 | 14.7 | 2.7E+18 | 18.4 | 2.1 | Earthquake |
| 152 | 2.8E-05 | 1.8 | 3.9E+18 | 18.6 | 2.2 | Quarry |
| 153 | 5.8E-05 | 1.4 | 8.2E+18 | 18.9 | 2.4 | Quarry |
| 154 | 5.6E-05 | 12.0 | 7.9E+18 | 18.9 | 2.4 | Earthquake |
| 155 | 1.3E-05 | 14.6 | 1.9E+18 | 18.3 | 2.0 | Earthquake |
| 156 | 2.2E-05 | 11.6 | 3.1E+18 | 18.5 | 2.1 | Earthquake |
| 157 | 3.2E-05 | 1.3 | 4.5E+18 | 18.7 | 2.2 | Quarry |
| 158 | 5.8E-05 | 14.4 | 8.2E+18 | 18.9 | 2.4 | Earthquake |
| 159 | 5.8E-05 | 1.5 | 8.1E+18 | 18.9 | 2.4 | Quarry |
| 160 | 4.5E-06 | 20.6 | 6.4E+17 | 17.8 | 1.6 | Earthquake |
| 161 | 1.9E-05 | 19.1 | 2.7E+18 | 18.4 | 2.1 | Earthquake |
| 162 | 6.2E-05 | 1.7 | 8.7E+18 | 18.9 | 2.4 | Quarry |
| 163 | 6.4E-05 | 10.2 | 9.0E+18 | 19.0 | 2.4 | Earthquake |
| 164 | 4.2E-05 | 1.4 | 5.9E+18 | 18.8 | 2.3 | Quarry |
| 165 | 3.5E-05 | 1.2 | 4.9E+18 | 18.7 | 2.2 | Quarry |
| 166 | 9.7E-06 | 22.8 | 1.4E+18 | 18.1 | 1.9 | Earthquake |
| 167 | 4.1E-05 | 1.9 | 5.8E+18 | 18.8 | 2.3 | Quarry |
| 168 | 4.7E-05 | 1.6 | 6.6E+18 | 18.8 | 2.3 | Quarry |
| 169 | 4.5E-05 | 1.8 | 6.4E+18 | 18.8 | 2.3 | Quarry |
| 170 | 4.4E-05 | 1.4 | 6.1E+18 | 18.8 | 2.3 | Quarry |
| 171 | 2.2E-05 | 11.6 | 3.1E+18 | 18.5 | 2.1 | Earthquake |
| 172 | 5.3E-05 | 8.8 | 7.5E+18 | 18.9 | 2.4 | Earthquake |
| 173 | 1.6E-05 | 16.0 | 2.3E+18 | 18.4 | 2.0 | Earthquake |
| 174 | 2.8E-05 | 1.7 | 3.9E+18 | 18.6 | 2.2 | Quarry |
| 175 | 6.5E-06 | 15.9 | 9.1E+17 | 18.0 | 1.7 | Earthquake |
| 176 | 6.8E-06 | 15.3 | 9.6E+17 | 18.0 | 1.8 | Earthquake |
| 177 | 2.5E-06 | 17.5 | 3.5E+17 | 17.5 | 1.5 | Earthquake |
| 178 | 4.8E-06 | 18.7 | 6.8E+17 | 17.8 | 1.7 | Earthquake |
| 179 | 2.4E-06 | 16.9 | 3.3E+17 | 17.5 | 1.5 | Earthquake |
| 180 | 2.2E-06 | 13.4 | 3.1E+17 | 17.5 | 1.4 | Earthquake |
| 181 | 1.4E-06 | 16.9 | 2.0E+17 | 17.3 | 1.3 | Earthquake |
| 182 | 9.1E-05 | 1.6 | 1.3E+19 | 19.1 | 2.5 | Quarry |
| 183 | 9.6E-06 | 17.3 | 1.4E+18 | 18.1 | 1.9 | Earthquake |
| 184 | 6.4E-06 | 12.7 | 9.1E+17 | 18.0 | 1.7 | Earthquake |
| 185 | 3.1E-05 | 2.3 | 4.3E+18 | 18.6 | 2.2 | Quarry |
| 186 | 3.2E-06 | 17.4 | 4.5E+17 | 17.7 | 1.5 | Earthquake |
| 187 | 1.7E-06 | 12.8 | 2.4E+17 | 17.4 | 1.4 | Earthquake |
| 188 | 3.2E-05 | 1.9 | 4.6E+18 | 18.7 | 2.2 | Quarry |
| 189 | 3.5E-05 | 2.0 | 4.9E+18 | 18.7 | 2.2 | Quarry |
| 190 | 7.4E-06 | 18.8 | 1.0E+18 | 18.0 | 1.8 | Earthquake |
| 191 | 9.0E-06 | 16.9 | 1.3E+18 | 18.1 | 1.8 | Earthquake |
| 192 | 2.3E-05 | 2.1 | 3.3E+18 | 18.5 | 2.1 | Quarry |
| 193 | 3.5E-05 | 2.2 | 4.9E+18 | 18.7 | 2.2 | Quarry |
| 194 | 3.8E-06 | 18.6 | 5.3E+17 | 17.7 | 1.6 | Earthquake |
| 195 | 5.9E-06 | 16.7 | 8.3E+17 | 17.9 | 1.7 | Earthquake |
| 196 | 5.6E-05 | 1.7 | 7.9E+18 | 18.9 | 2.4 | Quarry |
| 197 | 3.6E-05 | 1.8 | 5.1E+18 | 18.7 | 2.2 | Quarry |
| 198 | 5.7E-05 | 1.3 | 8.1E+18 | 18.9 | 2.4 | Quarry |
| 199 | 3.0E-05 | 1.9 | 4.2E+18 | 18.6 | 2.2 | Quarry |
| 200 | 3.4E-05 | 2.1 | 4.8E+18 | 18.7 | 2.2 | Quarry |
| 201 | 7.6E-06 | 17.1 | 1.1E+18 | 18.0 | 1.8 | Earthquake |
| 202 | 3.0E-05 | 16.6 | 4.2E+18 | 18.6 | 2.2 | Earthquake |
| 203 | 3.4E-05 | 1.6 | 4.8E+18 | 18.7 | 2.2 | Quarry |
| 204 | 9.7E-06 | 15.1 | 1.4E+18 | 18.1 | 1.9 | Earthquake |
| 205 | 3.7E-05 | 11.9 | 5.3E+18 | 18.7 | 2.3 | Earthquake |
| 206 | 5.5E-06 | 20.6 | 7.8E+17 | 17.9 | 1.7 | Earthquake |
| 207 | 5.5E-06 | 19.7 | 7.7E+17 | 17.9 | 1.7 | Earthquake |
| 208 | 5.8E-06 | 15.7 | 8.2E+17 | 17.9 | 1.7 | Earthquake |
| 209 | 2.8E-05 | 21.3 | 3.9E+18 | 18.6 | 2.2 | Earthquake |
| 210 | 2.8E-06 | 22.8 | 3.9E+17 | 17.6 | 1.5 | Earthquake |
| 211 | 2.5E-06 | 18.3 | 3.5E+17 | 17.5 | 1.5 | Earthquake |
| 212 | 1.2E-05 | 23.9 | 1.7E+18 | 18.2 | 1.9 | Earthquake |
| 213 | 1.0E-04 | 12.9 | 1.4E+19 | 19.2 | 2.5 | Earthquake |
| 214 | 4.0E-06 | 14.4 | 5.7E+17 | 17.8 | 1.6 | Earthquake |
| 215 | 1.3E-04 | 12.2 | 1.8E+19 | 19.3 | 2.6 | Earthquake |
| 216 | 2.5E-05 | 1.9 | 3.5E+18 | 18.5 | 2.1 | Quarry |
| 217 | 1.5E-06 | 17.6 | 2.1E+17 | 17.3 | 1.3 | Earthquake |
| 218 | 4.0E-05 | 21.8 | 5.6E+18 | 18.7 | 2.3 | Earthquake |
| 219 | 2.3E-06 | 17.5 | 3.2E+17 | 17.5 | 1.4 | Earthquake |
| 220 | 2.1E-06 | 18.6 | 2.9E+17 | 17.5 | 1.4 | Earthquake |
| 221 | 5.3E-06 | 18.8 | 7.4E+17 | 17.9 | 1.7 | Earthquake |
| 222 | 4.6E-06 | 16.4 | 6.4E+17 | 17.8 | 1.6 | Earthquake |
| 223 | 5.3E-05 | 15.8 | 7.5E+18 | 18.9 | 2.4 | Earthquake |
| 224 | 9.0E-05 | 17.7 | 1.3E+19 | 19.1 | 2.5 | Earthquake |
| 225 | 6.5E-05 | 1.7 | 9.2E+18 | 19.0 | 2.4 | Quarry |
| 226 | 3.3E-06 | 16.6 | 4.7E+17 | 17.7 | 1.6 | Earthquake |
| 227 | 5.0E-06 | 18.1 | 7.0E+17 | 17.8 | 1.7 | Earthquake |
| 228 | 5.0E-05 | 11.5 | 7.1E+18 | 18.8 | 2.3 | Earthquake |
| 229 | 3.7E-06 | 20.3 | 5.2E+17 | 17.7 | 1.6 | Earthquake |
| 230 | 1.8E-05 | 16.8 | 2.5E+18 | 18.4 | 2.0 | Earthquake |
| 231 | 6.9E-06 | 19.9 | 9.8E+17 | 18.0 | 1.8 | Earthquake |
| 232 | 1.0E-05 | 21.0 | 1.5E+18 | 18.2 | 1.9 | Earthquake |
| 233 | 8.5E-06 | 20.4 | 1.2E+18 | 18.1 | 1.8 | Earthquake |
| 234 | 7.3E-06 | 20.2 | 1.0E+18 | 18.0 | 1.8 | Earthquake |
| 235 | 3.6E-06 | 19.4 | 5.1E+17 | 17.7 | 1.6 | Earthquake |
| 236 | 3.0E-05 | 27.5 | 4.2E+18 | 18.6 | 2.2 | Earthquake |
| 237 | 6.7E-05 | 1.6 | 9.5E+18 | 19.0 | 2.4 | Quarry |
| 238 | 2.5E-06 | 14.2 | 3.5E+17 | 17.5 | 1.5 | Earthquake |
| 239 | 2.4E-06 | 18.1 | 3.4E+17 | 17.5 | 1.5 | Earthquake |
| 240 | 2.9E-06 | 14.6 | 4.0E+17 | 17.6 | 1.5 | Earthquake |
| 241 | 3.3E-05 | 1.6 | 4.7E+18 | 18.7 | 2.2 | Quarry |
| 242 | 2.8E-06 | 23.2 | 3.9E+17 | 17.6 | 1.5 | Earthquake |
| 243 | 5.4E-06 | 20.0 | 7.6E+17 | 17.9 | 1.7 | Earthquake |
| 244 | 6.1E-06 | 24.0 | 8.6E+17 | 17.9 | 1.7 | Earthquake |
| 245 | 5.1E-06 | 27.4 | 7.1E+17 | 17.9 | 1.7 | Earthquake |
| 246 | 2.2E-06 | 20.8 | 3.2E+17 | 17.5 | 1.4 | Earthquake |
| 247 | 9.9E-06 | 20.6 | 1.4E+18 | 18.1 | 1.9 | Earthquake |
| 248 | 4.1E-06 | 17.5 | 5.7E+17 | 17.8 | 1.6 | Earthquake |
| 249 | 2.5E-05 | 1.9 | 3.5E+18 | 18.5 | 2.1 | Quarry |
| 250 | 2.9E-06 | 19.8 | 4.0E+17 | 17.6 | 1.5 | Earthquake |
| 251 | 2.2E-05 | 12.7 | 3.2E+18 | 18.5 | 2.1 | Earthquake |
| 252 | 3.8E-06 | 17.7 | 5.4E+17 | 17.7 | 1.6 | Earthquake |
| 253 | 2.4E-05 | 2.0 | 3.3E+18 | 18.5 | 2.1 | Quarry |
| 254 | 6.2E-06 | 22.0 | 8.7E+17 | 17.9 | 1.7 | Earthquake |
| 255 | 8.8E-06 | 16.0 | 1.2E+18 | 18.1 | 1.8 | Earthquake |
| 256 | 2.3E-05 | 12.9 | 3.3E+18 | 18.5 | 2.1 | Earthquake |
| 257 | 3.8E-06 | 18.5 | 5.3E+17 | 17.7 | 1.6 | Earthquake |
| 258 | 3.1E-06 | 20.1 | 4.4E+17 | 17.6 | 1.5 | Earthquake |
| 259 | 6.8E-05 | 1.6 | 9.5E+18 | 19.0 | 2.4 | Quarry |
| 260 | 3.6E-05 | 16.6 | 5.0E+18 | 18.7 | 2.2 | Earthquake |
| 261 | 5.4E-05 | 15.4 | 7.6E+18 | 18.9 | 2.4 | Earthquake |
| 262 | 1.0E-05 | 18.3 | 1.4E+18 | 18.2 | 1.9 | Earthquake |
| 263 | 4.4E-06 | 13.0 | 6.2E+17 | 17.8 | 1.6 | Earthquake |
| 264 | 1.1E-05 | 16.2 | 1.5E+18 | 18.2 | 1.9 | Earthquake |
| 265 | 1.1E-05 | 15.6 | 1.5E+18 | 18.2 | 1.9 | Earthquake |
| 266 | 4.3E-05 | 16.0 | 6.0E+18 | 18.8 | 2.3 | Earthquake |
| 267 | 3.2E-05 | 14.6 | 4.5E+18 | 18.7 | 2.2 | Earthquake |
| 268 | 8.1E-05 | 1.6 | 1.1E+19 | 19.1 | 2.5 | Quarry |
| 269 | 6.8E-06 | 21.7 | 9.6E+17 | 18.0 | 1.8 | Earthquake |
| 270 | 9.6E-06 | 19.6 | 1.3E+18 | 18.1 | 1.9 | Earthquake |
| 271 | 7.6E-05 | 15.5 | 1.1E+19 | 19.0 | 2.5 | Earthquake |
| 272 | 9.0E-06 | 18.4 | 1.3E+18 | 18.1 | 1.8 | Earthquake |
| 273 | 7.6E-06 | 19.8 | 1.1E+18 | 18.0 | 1.8 | Earthquake |
| 274 | 2.6E-05 | 16.5 | 3.6E+18 | 18.6 | 2.1 | Earthquake |
| 275 | 5.8E-06 | 17.1 | 8.2E+17 | 17.9 | 1.7 | Earthquake |
| 276 | 3.4E-05 | 17.3 | 4.8E+18 | 18.7 | 2.2 | Earthquake |
| 277 | 1.9E-05 | 15.1 | 2.7E+18 | 18.4 | 2.1 | Earthquake |
| 278 | 8.7E-05 | 8.8 | 1.2E+19 | 19.1 | 2.5 | Earthquake |
| 279 | 6.0E-05 | 8.9 | 8.4E+18 | 18.9 | 2.4 | Earthquake |
| 280 | 3.5E-05 | 1.5 | 4.9E+18 | 18.7 | 2.2 | Quarry |
| 281 | 3.7E-05 | 1.7 | 5.2E+18 | 18.7 | 2.2 | Quarry |
| 282 | 3.4E-05 | 1.8 | 4.8E+18 | 18.7 | 2.2 | Quarry |
| 283 | 5.0E-05 | 1.9 | 7.1E+18 | 18.9 | 2.3 | Quarry |
| 284 | 7.6E-05 | 11.9 | 1.1E+19 | 19.0 | 2.5 | Earthquake |
| 285 | 5.3E-06 | 14.5 | 7.5E+17 | 17.9 | 1.7 | Earthquake |
| 286 | 1.2E-05 | 15.5 | 1.7E+18 | 18.2 | 1.9 | Earthquake |
| 287 | 5.2E-05 | 1.4 | 7.3E+18 | 18.9 | 2.3 | Quarry |
| 288 | 6.9E-06 | 14.6 | 9.7E+17 | 18.0 | 1.8 | Earthquake |
| 289 | 3.4E-05 | 1.3 | 4.7E+18 | 18.7 | 2.2 | Quarry |
| 290 | 6.6E-05 | 12.8 | 9.2E+18 | 19.0 | 2.4 | Earthquake |
| 291 | 5.5E-06 | 15.3 | 7.7E+17 | 17.9 | 1.7 | Earthquake |
| 292 | 1.4E-05 | 22.0 | 1.9E+18 | 18.3 | 2.0 | Earthquake |
| 293 | 2.3E-05 | 18.6 | 3.3E+18 | 18.5 | 2.1 | Earthquake |
| 294 | 5.4E-06 | 24.3 | 7.6E+17 | 17.9 | 1.7 | Earthquake |
| 295 | 5.7E-06 | 17.2 | 8.1E+17 | 17.9 | 1.7 | Earthquake |
| 296 | 3.3E-05 | 2.1 | 4.7E+18 | 18.7 | 2.2 | Quarry |
| 297 | 8.8E-06 | 14.3 | 1.2E+18 | 18.1 | 1.8 | Earthquake |
| 298 | 4.2E-06 | 22.4 | 6.0E+17 | 17.8 | 1.6 | Earthquake |
| 299 | 2.5E-04 | 11.9 | 3.5E+19 | 19.5 | 2.8 | Earthquake |
| 300 | 6.6E-06 | 20.6 | 9.3E+17 | 18.0 | 1.7 | Earthquake |
| 301 | 2.9E-05 | 1.6 | 4.1E+18 | 18.6 | 2.2 | Quarry |
| 302 | 2.5E-05 | 22.5 | 3.5E+18 | 18.5 | 2.1 | Earthquake |
| 303 | 7.1E-06 | 15.8 | 1.0E+18 | 18.0 | 1.8 | Earthquake |
| 304 | 2.2E-06 | 22.4 | 3.1E+17 | 17.5 | 1.4 | Earthquake |
| 305 | 6.9E-05 | 15.4 | 9.7E+18 | 19.0 | 2.4 | Earthquake |
| 306 | 4.6E-06 | 21.2 | 6.5E+17 | 17.8 | 1.6 | Earthquake |
| 307 | 3.1E-05 | 1.8 | 4.3E+18 | 18.6 | 2.2 | Quarry |
| 308 | 1.5E-05 | 13.4 | 2.1E+18 | 18.3 | 2.0 | Earthquake |
| 309 | 5.3E-06 | 19.9 | 7.5E+17 | 17.9 | 1.7 | Earthquake |
| 310 | 2.0E-05 | 1.4 | 2.8E+18 | 18.4 | 2.1 | Quarry |
| 311 | 7.4E-06 | 18.4 | 1.0E+18 | 18.0 | 1.8 | Earthquake |
| 312 | 2.0E-05 | 13.8 | 2.8E+18 | 18.4 | 2.1 | Earthquake |
| 313 | 3.9E-06 | 22.5 | 5.4E+17 | 17.7 | 1.6 | Earthquake |
| 314 | 2.2E-05 | 14.7 | 3.1E+18 | 18.5 | 2.1 | Earthquake |
| 315 | 1.4E-05 | 21.0 | 1.9E+18 | 18.3 | 2.0 | Earthquake |
| 316 | 2.6E-05 | 20.4 | 3.7E+18 | 18.6 | 2.1 | Earthquake |
| 317 | 7.1E-05 | 11.6 | 1.0E+19 | 19.0 | 2.4 | Earthquake |
| 318 | 3.5E-05 | 1.6 | 4.9E+18 | 18.7 | 2.2 | Quarry |
| 319 | 2.2E-06 | 17.3 | 3.1E+17 | 17.5 | 1.4 | Earthquake |
| 320 | 6.3E-06 | 19.6 | 8.9E+17 | 17.9 | 1.7 | Earthquake |
| 321 | 4.6E-05 | 1.8 | 6.4E+18 | 18.8 | 2.3 | Quarry |
| 322 | 3.4E-06 | 21.7 | 4.7E+17 | 17.7 | 1.6 | Earthquake |
| 323 | 2.9E-05 | 1.6 | 4.0E+18 | 18.6 | 2.2 | Quarry |
| 324 | 1.4E-05 | 16.5 | 2.0E+18 | 18.3 | 2.0 | Earthquake |
| 325 | 3.7E-05 | 1.1 | 5.2E+18 | 18.7 | 2.2 | Quarry |
| 326 | 1.2E-05 | 20.6 | 1.7E+18 | 18.2 | 1.9 | Earthquake |
| 327 | 5.7E-05 | 12.2 | 8.0E+18 | 18.9 | 2.4 | Earthquake |
| 328 | 2.7E-06 | 14.0 | 3.9E+17 | 17.6 | 1.5 | Earthquake |
| 329 | 5.5E-05 | 11.1 | 7.7E+18 | 18.9 | 2.4 | Earthquake |
| 330 | 1.1E-04 | 10.5 | 1.5E+19 | 19.2 | 2.6 | Earthquake |
| 331 | 2.9E-05 | 15.9 | 4.0E+18 | 18.6 | 2.2 | Earthquake |
| 332 | 1.8E-05 | 17.6 | 2.5E+18 | 18.4 | 2.0 | Earthquake |
| 333 | 1.9E-05 | 15.4 | 2.7E+18 | 18.4 | 2.1 | Earthquake |
| 334 | 2.8E-05 | 1.3 | 3.9E+18 | 18.6 | 2.2 | Quarry |
| 335 | 1.7E-05 | 13.9 | 2.4E+18 | 18.4 | 2.0 | Earthquake |
| 336 | 1.6E-05 | 18.1 | 2.2E+18 | 18.3 | 2.0 | Earthquake |
| 337 | 4.9E-05 | 1.7 | 7.0E+18 | 18.8 | 2.3 | Quarry |
| 338 | 4.1E-05 | 1.7 | 5.7E+18 | 18.8 | 2.3 | Quarry |
| 339 | 2.0E-05 | 20.0 | 2.7E+18 | 18.4 | 2.1 | Earthquake |
| 340 | 1.3E-05 | 16.2 | 1.8E+18 | 18.2 | 1.9 | Earthquake |
| 341 | 8.3E-05 | 19.0 | 1.2E+19 | 19.1 | 2.5 | Earthquake |
| 342 | 1.8E-05 | 1.8 | 2.6E+18 | 18.4 | 2.0 | Quarry |
| 343 | 1.9E-05 | 15.8 | 2.6E+18 | 18.4 | 2.1 | Earthquake |
| 344 | 4.6E-05 | 1.4 | 6.5E+18 | 18.8 | 2.3 | Quarry |
| 345 | 1.6E-05 | 21.9 | 2.2E+18 | 18.3 | 2.0 | Earthquake |
| 346 | 7.7E-06 | 22.2 | 1.1E+18 | 18.0 | 1.8 | Earthquake |
| 347 | 9.6E-06 | 16.8 | 1.4E+18 | 18.1 | 1.9 | Earthquake |
| 348 | 1.8E-05 | 21.7 | 2.5E+18 | 18.4 | 2.0 | Earthquake |
| 349 | 2.6E-05 | 18.3 | 3.7E+18 | 18.6 | 2.1 | Earthquake |
| 350 | 6.3E-06 | 17.7 | 8.8E+17 | 17.9 | 1.7 | Earthquake |
| 351 | 5.1E-05 | 1.4 | 7.2E+18 | 18.9 | 2.3 | Quarry |
| 352 | 6.7E-06 | 22.5 | 9.4E+17 | 18.0 | 1.8 | Earthquake |
| 353 | 3.5E-05 | 1.4 | 5.0E+18 | 18.7 | 2.2 | Quarry |
| 354 | 1.3E-04 | 13.4 | 1.9E+19 | 19.3 | 2.6 | Earthquake |
| 355 | 6.4E-05 | 18.0 | 9.0E+18 | 19.0 | 2.4 | Earthquake |
| 356 | 1.7E-05 | 14.6 | 2.4E+18 | 18.4 | 2.0 | Earthquake |
| 357 | 5.0E-06 | 21.7 | 7.1E+17 | 17.8 | 1.7 | Earthquake |
| 358 | 3.3E-05 | 16.6 | 4.7E+18 | 18.7 | 2.2 | Earthquake |
| 359 | 8.7E-05 | 1.1 | 1.2E+19 | 19.1 | 2.5 | Quarry |
| 360 | 5.5E-06 | 21.7 | 7.8E+17 | 17.9 | 1.7 | Earthquake |
| 361 | 3.9E-05 | 2.0 | 5.5E+18 | 18.7 | 2.3 | Quarry |
| 362 | 4.6E-05 | 10.8 | 6.5E+18 | 18.8 | 2.3 | Earthquake |
| 363 | 1.8E-05 | 17.7 | 2.6E+18 | 18.4 | 2.0 | Earthquake |
| 364 | 3.6E-05 | 1.6 | 5.1E+18 | 18.7 | 2.2 | Quarry |
| 365 | 1.2E-05 | 18.0 | 1.7E+18 | 18.2 | 1.9 | Earthquake |
| 366 | 4.8E-05 | 11.7 | 6.8E+18 | 18.8 | 2.3 | Earthquake |
| 367 | 2.0E-05 | 1.9 | 2.8E+18 | 18.5 | 2.1 | Quarry |
| 368 | 6.1E-05 | 1.5 | 8.7E+18 | 18.9 | 2.4 | Quarry |
| 369 | 9.1E-06 | 20.0 | 1.3E+18 | 18.1 | 1.8 | Earthquake |
| 370 | 7.9E-05 | 1.4 | 1.1E+19 | 19.0 | 2.5 | Quarry |
| 371 | 2.9E-05 | 1.6 | 4.1E+18 | 18.6 | 2.2 | Quarry |
| 372 | 2.0E-05 | 15.3 | 2.8E+18 | 18.4 | 2.1 | Earthquake |
| 373 | 9.6E-05 | 1.4 | 1.4E+19 | 19.1 | 2.5 | Quarry |
| 374 | 6.8E-06 | 17.0 | 9.5E+17 | 18.0 | 1.8 | Earthquake |
| 375 | 9.1E-06 | 20.7 | 1.3E+18 | 18.1 | 1.8 | Earthquake |
| 376 | 9.0E-05 | 1.3 | 1.3E+19 | 19.1 | 2.5 | Quarry |
| 377 | 3.0E-05 | 1.3 | 4.2E+18 | 18.6 | 2.2 | Quarry |
| 378 | 6.9E-05 | 1.2 | 9.7E+18 | 19.0 | 2.4 | Quarry |
| 379 | 7.4E-05 | 1.5 | 1.0E+19 | 19.0 | 2.4 | Quarry |
| 380 | 3.9E-05 | 2.1 | 5.4E+18 | 18.7 | 2.3 | Quarry |
| 381 | 5.4E-05 | 9.2 | 7.6E+18 | 18.9 | 2.4 | Earthquake |
| 382 | 8.7E-06 | 18.3 | 1.2E+18 | 18.1 | 1.8 | Earthquake |
| 383 | 8.9E-06 | 18.1 | 1.3E+18 | 18.1 | 1.8 | Earthquake |
| 384 | 5.7E-05 | 11.3 | 8.0E+18 | 18.9 | 2.4 | Earthquake |
| 385 | 2.4E-05 | 18.1 | 3.4E+18 | 18.5 | 2.1 | Earthquake |
| 386 | 3.8E-05 | 13.4 | 5.4E+18 | 18.7 | 2.3 | Earthquake |
| 387 | 6.9E-06 | 18.0 | 9.8E+17 | 18.0 | 1.8 | Earthquake |
| 388 | 4.2E-06 | 20.4 | 6.0E+17 | 17.8 | 1.6 | Earthquake |
| 389 | 3.9E-05 | 1.6 | 5.5E+18 | 18.7 | 2.3 | Quarry |
| 390 | 1.0E-05 | 22.3 | 1.4E+18 | 18.2 | 1.9 | Earthquake |
| 391 | 2.0E-05 | 1.4 | 2.8E+18 | 18.4 | 2.1 | Quarry |
| 392 | 3.9E-05 | 1.6 | 5.5E+18 | 18.7 | 2.3 | Quarry |
| 393 | 1.4E-05 | 17.9 | 2.0E+18 | 18.3 | 2.0 | Earthquake |
| 394 | 2.9E-05 | 27.2 | 4.0E+18 | 18.6 | 2.2 | Earthquake |
| 395 | 6.1E-05 | 1.4 | 8.5E+18 | 18.9 | 2.4 | Quarry |
| 396 | 2.4E-05 | 2.3 | 3.3E+18 | 18.5 | 2.1 | Quarry |
| 397 | 2.3E-05 | 2.3 | 3.2E+18 | 18.5 | 2.1 | Quarry |
| 398 | 3.8E-05 | 1.5 | 5.3E+18 | 18.7 | 2.3 | Quarry |
| 399 | 4.5E-05 | 2.0 | 6.3E+18 | 18.8 | 2.3 | Quarry |
| 400 | 4.1E-05 | 1.3 | 5.8E+18 | 18.8 | 2.3 | Quarry |
| 401 | 4.8E-05 | 1.4 | 6.8E+18 | 18.8 | 2.3 | Quarry |
| 402 | 3.9E-05 | 1.6 | 5.5E+18 | 18.7 | 2.3 | Quarry |
| 403 | 3.4E-05 | 1.7 | 4.8E+18 | 18.7 | 2.2 | Quarry |
| 404 | 4.6E-05 | 1.5 | 6.5E+18 | 18.8 | 2.3 | Quarry |
| 405 | 4.1E-05 | 1.5 | 5.8E+18 | 18.8 | 2.3 | Quarry |
| 406 | 2.8E-05 | 1.3 | 3.9E+18 | 18.6 | 2.2 | Quarry |
| 407 | 3.0E-05 | 1.7 | 4.2E+18 | 18.6 | 2.2 | Quarry |
| 408 | 4.9E-05 | 1.7 | 7.0E+18 | 18.8 | 2.3 | Quarry |
| 409 | 7.1E-05 | 1.0 | 1.0E+19 | 19.0 | 2.4 | Quarry |
| 410 | 3.9E-05 | 1.9 | 5.4E+18 | 18.7 | 2.3 | Quarry |
| 411 | 3.3E-05 | 1.4 | 4.7E+18 | 18.7 | 2.2 | Quarry |
| 412 | 5.6E-05 | 1.7 | 7.9E+18 | 18.9 | 2.4 | Quarry |
| 413 | 5.4E-05 | 1.3 | 7.6E+18 | 18.9 | 2.4 | Quarry |
